# Supplementary material for: Modified WCRF/AICR Score and All-Cause, Digestive System, Cardiovascular, Cancer and Other-Cause-Related Mortality: A Competing Risk Analysis of Two Cohort Studies Conducted in Southern Italy
Source: MDPI journal article supplement (doi:10.3390/nu13114002), 2021-11-10
Supplement: s1 [file s1]

## Supplementary

Supplementary Table S1. Baseline Characteristics of Participants: MICOL/PANEL and NUTRIHEP Studies by Food Frequency Questionnaire. Castellana Grotte, Putignano (BA), Italy, 2005-2020

| Variable                              | Food Frequency Questionnaire |                |
|---------------------------------------|------------------------------|----------------|
|                                       | YES                          | NO             |
| N***                                  | 4.905 (93.0)                 | 366 (7.0)      |
| Age at Enrollment (years)*            | 51.42 (15.82)                | 45.56 (15.55)  |
| DBP (mmHg)*                           | 124.12 (17.82)               | 122.56 (16.27) |
| SBP (mmHg)*                           | 76.76 (9.62)                 | 77.76 (9.56)   |
| Weight (kg)*                          | 73.06 (14.97)                | 72.16 (16.83)  |
| BMI (kg/m <sup>2</sup> )*             | 27.51 (5.15)                 | 26.59 (5.54)   |
| Triglycerides (mmol/L)*               | 1.38 (1.02)                  | 1.27 (0.95)    |
| Total Cholesterol (mmol/L)*           | 5.10 (1.02)                  | 4.98 (0.96)    |
| HDL (mmol/L)*                         | 1.33 (0.35)                  | 1.34 (0.34)    |
| LDL (mmol/L)*                         | 3.14 (0.88)                  | 3.05 (0.88)    |
| GGT (μkat/L)*                         | 0.25 (0.25)                  | 0.24 (0.22)    |
| Glucose (mmol/L)*                     | 5.88 (1.40)                  | 5.87 (1.53)    |
| GPT (μkat/L)*                         | 0.28 (0.22)                  | 0.26 (0.19)    |
| Sex***                                |                              |                |
| Female                                | 2372 (92.6)                  | 188 (7.4)      |
| Male                                  | 2533 (93.4)                  | 178 (6.6)      |
| Age classes***                        |                              |                |
| ≤30                                   | 422 (86.1)                   | 68 (13.9)      |
| 31-35                                 | 457 (91.4)                   | 43 (8.6)       |
| 36-40                                 | 585 (93.3)                   | 42 (6.7)       |
| 41-45                                 | 518 (90.6)                   | 54 (9.4)       |
| 46-50                                 | 444 (94.1)                   | 28 (5.9)       |
| 51-55                                 | 478 (91.4)                   | 45 (8.6)       |
| 56-60                                 | 537 (95.2)                   | 27 (4.8)       |
| 61-65                                 | 416 (96.7)                   | 14 (3.3)       |
| 66-70                                 | 370 (95.9)                   | 16 (4.1)       |
| 71-75                                 | 325 (96.4)                   | 12 (3.6)       |
| >75                                   | 353 (95.4)                   | 17 (4.6)       |
| Smoke***                              |                              |                |
| Never/Former                          | 4043 (95.1)                  | 210 (4.9)      |
| Current                               | 839 (91.9)                   | 74 (8.1)       |
| Without Information                   | 23 (21.9)                    | 82 (78.1)      |
| Education***                          |                              |                |
| Primary School                        | 1350 (97.1)                  | 41 (2.9)       |
| Secondary School                      | 1483 (94.8)                  | 82 (5.2)       |
| High School                           | 1391 (94.2)                  | 86 (5.8)       |
| Graduated                             | 497 (95.0)                   | 26 (5.0)       |
| Illiterate                            | 170 (98.3)                   | 3 (1.7)        |
| Without Information                   | 14 (9.9)                     | 128 (90.1)     |
| Job***                                |                              |                |
| Managers & Professionals              | 287 (94.4)                   | 17 (5.6)       |
| Craft. Agricultural and Sales Workers | 1179 (93.6)                  | 81 (6.4)       |
| Elementary Occupations                | 1132 (95.3)                  | 56 (4.7)       |
| Housewife                             | 634 (96.5)                   | 23 (3.5)       |
| Pensioneers                           | 1371 (97.4)                  | 36 (2.6)       |
| Jobless                               | 254 (91.0)                   | 25 (9.0)       |
| Without Information                   | 48 (27.3)                    | 128 (72.7)     |
| Marital Status***                     |                              |                |
| Single                                | 765 (94.6)                   | 44 (5.4)       |
| Married/Coupled                       | 3667 (96.6)                  | 129 (3.4)      |
| Separated/Divorced                    | 117 (97.5)                   | 3 (2.5)        |
| Widower                               | 314 (98.4)                   | 5 (1.6)        |

|                     |           |            |
|---------------------|-----------|------------|
| Without information | 42 (18.5) | 185 (81.5) |
|---------------------|-----------|------------|

SBP: Systolic Blood Pressure; DBP: Diastolic Blood Pressure; BMI: Body Mass Index; GGT:  $\gamma$ -Glutamyltransferase; GPT:Glutamate Pyruvate Transaminase HDL: High Density Lipoprotein Cholesterol; LDL: Low Density Lipoprotein Cholesterol;; Cells reporting subject characteristics contain \*Mean $\pm$ (SD). \*\*\*Number (Percentage)

Supplementary Table S2. Characteristics of Participants by modified WCRF/AICR Score Categories MICOL/PANEL Studies. Castellana Grotte (BA), Italy, 2005-2020

|                                 | All <sup>‡</sup>     | Modified WCRF/AICR Score Categories <sup>‡</sup> |                      |                      |
|---------------------------------|----------------------|--------------------------------------------------|----------------------|----------------------|
|                                 | 0-11 <sup>‡</sup>    | ≤5                                               | 5.5-7                | >7                   |
| N                               | 2848                 | 576                                              | 1815                 | 457                  |
| Age at Enrollment (years)*      | 54.70 (14.95)        | 51.37 (13.33)                                    | 54.13 (14.73)        | 61.18 (15.81)        |
| DBP (mmHg)*                     | 123.45 (19.80)       | 122.99 (17.49)                                   | 122.98 (19.85)       | 125.91 (22.11)       |
| SBP (mmHg)*                     | 74.69 (10.16)        | 76.59 (10.67)                                    | 74.42 (10.01)        | 73.38 (9.76)         |
| Weight (kg)*                    | 75.07 (15.26)        | 83.43 (14.76)                                    | 74.58 (14.81)        | 66.46 (11.94)        |
| BMI (kg/m²)*                    | 28.65 (5.25)         | 30.36 (4.97)                                     | 28.54 (5.31)         | 26.95 (4.66)         |
| Kcal days                       | 2268.16 (836.65)     | 2770.11 (1.006.47)                               | 2223.29 (732.33)     | 1794.05 (629.41)     |
| Triglycerides (mmol/L)*         | 1.45 (1.02)          | 1.60 (1.12)                                      | 1.44 (1.03)          | 1.30 (0.76)          |
| Total Cholesterol (mmol/L)*     | 5.16 (1.00)          | 5.25 (0.97)                                      | 5.15 (1.01)          | 5.07 (0.99)          |
| HDL (mmol/L)*                   | 1.32 (0.36)          | 1.26 (0.33)                                      | 1.32 (0.37)          | 1.40 (0.37)          |
| LDL (mmol/L)*                   | 3.17 (0.86)          | 3.26 (0.83)                                      | 3.16 (0.86)          | 3.07 (0.88)          |
| Glucose (mmol/L)*               | 6.05 (1.51)          | 6.15 (1.32)                                      | 6.01 (1.45)          | 6.11 (1.87)          |
| GPT (μkat/L)*                   | 0.30 (0.25)          | 0.33 (0.23)                                      | 0.28 (0.22)          | 0.31 (0.37)          |
| GGT(μkat/L)*                    | 0.28 (0.29)          | 0.33 (0.33)                                      | 0.26 (0.26)          | 0.26 (0.34)          |
| Sex***                          |                      |                                                  |                      |                      |
| Female                          | 1226 (43.0)          | 102 (17.7)                                       | 812 (44.7)           | 312 (68.3)           |
| Male                            | 1622 (57.0)          | 474 (82.3)                                       | 1003 (55.3)          | 145 (31.7)           |
| Age (categorical. years)        |                      |                                                  |                      |                      |
| <40                             | 621 (21.8)           | 138 (24.0)                                       | 418 (23.0)           | 65 (14.2)            |
| 40-49                           | 588 (20.6)           | 148 (25.7)                                       | 378 (20.8)           | 62 (13.6)            |
| 50-59                           | 560 (19.7)           | 141 (24.5)                                       | 352 (19.4)           | 67 (14.7)            |
| 60-69                           | 525 (18.4)           | 86 (14.9)                                        | 345 (19.0)           | 94 (20.6)            |
| ≥70                             | 554 (19.5)           | 63 (10.9)                                        | 322 (17.7)           | 169 (37.0)           |
| Smoke***                        |                      |                                                  |                      |                      |
| Never/Former                    | 2319 (81.4)          | 452 (78.5)                                       | 1475 (81.3)          | 392 (85.8)           |
| Current                         | 529 (18.6)           | 124 (21.5)                                       | 340 (18.7)           | 65 (14.2)            |
| Observation time**              | 14.95 (14.12. 15.33) | 14.95 (14.80. 15.30)                             | 14.95 (14.12. 15.33) | 14.95 (12.94. 15.34) |
| Age at Death (years)*           | 69.24 (56.08. 79.95) | 64.49 (55.07. 74.50)                             | 68.63 (55.55. 79.28) | 77.05 (61.93. 86.04) |
| Status***                       |                      |                                                  |                      |                      |
| Alive and/or Censored           | 2274 (79.8)          | 491 (85.2)                                       | 1469 (80.9)          | 314 (68.7)           |
| Dead                            | 574 (20.2)           | 85 (14.8)                                        | 346 (19.1)           | 143 (31.3)           |
| Cause of Death***               |                      |                                                  |                      |                      |
| Alive and/or Censored           | 2272 (79.8)          | 490 (85.1)                                       | 1468 (80.9)          | 314 (68.7)           |
| DSD-related mortality           | 104 (3.7)            | 20 (3.5)                                         | 57 (3.1)             | 27 (5.9)             |
| CVD-related mortality           | 161 (5.7)            | 22 (3.8)                                         | 101 (5.6)            | 38 (8.3)             |
| CR-related mortality            | 97 (3.4)             | 18 (3.1)                                         | 59 (3.3)             | 20 (4.4)             |
| Other-Cause mortality           | 214 (7.5)            | 26 (4.5)                                         | 130 (7.2)            | 58 (12.7)            |
| Education***                    |                      |                                                  |                      |                      |
| Primary School                  | 847 (29.7)           | 159 (27.6)                                       | 535 (29.5)           | 153 (33.5)           |
| Secondary School                | 888 (31.2)           | 188 (32.6)                                       | 556 (30.6)           | 144 (31.5)           |
| High School                     | 685 (24.1)           | 150 (26.0)                                       | 445 (24.5)           | 90 (19.7)            |
| Graduated                       | 324 (11.4)           | 56 (9.7)                                         | 217 (12.0)           | 51 (11.2)            |
| Illiterate                      | 104 (3.7)            | 23 (4.0)                                         | 62 (3.4)             | 19 (4.2)             |
| Job***                          |                      |                                                  |                      |                      |
| Managers & Professionals Craft. |                      |                                                  |                      |                      |
| Agricultural and Sales Workers  | 125 (4.4)            | 35 (6.1)                                         | 75 (4.1)             | 15 (3.3)             |
| Elementary Occupations          | 716 (25.1)           | 169 (29.3)                                       | 460 (25.3)           | 87 (19.0)            |
| Housewife                       | 701 (24.6)           | 147 (25.5)                                       | 464 (25.6)           | 90 (19.7)            |
| Pensioneers                     | 322 (11.3)           | 40 (6.9)                                         | 219 (12.1)           | 63 (13.8)            |
| Jobless                         | 938 (32.9)           | 176 (30.6)                                       | 571 (31.5)           | 191 (41.8)           |
| Marital Status***               |                      |                                                  |                      |                      |
| Single                          | 309 (10.8)           | 58 (10.1)                                        | 200 (11.0)           | 51 (11.2)            |

|                    |             |            |             |            |
|--------------------|-------------|------------|-------------|------------|
| Married/Coupled    | 2208 (77.5) | 477 (82.8) | 1424 (78.5) | 307 (67.2) |
| Separated/Divorced | 84 (2.9)    | 17 (3.0)   | 52 (2.9)    | 15 (3.3)   |
| Widower            | 247 (8.7)   | 24 (4.2)   | 139 (7.7)   | 84 (18.4)  |
| Diabetes ***       |             |            |             |            |
| No                 | 2569 (90.2) | 529 (91.8) | 1650 (90.9) | 390 (85.3) |
| Yes                | 279 (9.8)   | 47 (8.2)   | 165 (9.1)   | 67 (14.7)  |
| Dyslipidemia ***   |             |            |             |            |
| No                 | 2120 (74.4) | 430 (74.7) | 1365 (75.2) | 325 (71.1) |
| Yes                | 728 (25.6)  | 146 (25.3) | 450 (24.8)  | 132 (28.9) |
| Hypertension***    |             |            |             |            |
| No                 | 1895 (66.5) | 406 (70.5) | 1220 (67.2) | 269 (58.9) |
| Yes                | 953 (33.5)  | 170 (29.5) | 595 (32.8)  | 188 (41.1) |

GGT:  $\gamma$ -Glutamyltransferase ; GPT:Glutamate Pyruvate; BMI: Body Mass Index; DBP: Diastolic Blood Pressure; SBP: Systolic Blood Pressure; HDL: High Density Lipoprotein Cholesterol; LDL: Low Density Lipoprotein Cholesterol; RChol: Remnant Cholesterol; CVD-related mortality: Cardiovascular Disease related mortality; DSD-related mortality: Digestive System Disease -related mortality. Cells reporting subject characteristics contain \*Mean  $\pm$ (SD). \*\*Median (IQR). \*\*\*Number. †(Percentage) Percentages calculated per column.

Supplementary Table S3. Characteristics of Participants by modified WCRF/AICR Score

Categories NUTRIHEP Study, Putignano (BA), Italy, 2005-2020

|                                       | All <sup>‡</sup>     | Modified WCRF/AICR Score Categories <sup>‡</sup> |                      |                      |  |
|---------------------------------------|----------------------|--------------------------------------------------|----------------------|----------------------|--|
|                                       | 0-11                 | ≤5                                               | 5.5-7                | >7                   |  |
| N                                     | 2018                 | 195                                              | 1134                 | 689                  |  |
| Age at Enrollment (years)*            | 46.88 (15.86)        | 41.58 (14.18)                                    | 45.78 (15.91)        | 50.17 (15.59)        |  |
| DBP (mmHg)*                           | 125.06 (14.33)       | 125.41 (13.84)                                   | 124.88 (14.27)       | 125.25 (14.59)       |  |
| SBP (mmHg)*                           | 79.80 (8.19)         | 80.32 (7.67)                                     | 79.63 (8.30)         | 79.93 (8.15)         |  |
| Weight (kg)*                          | 70.21 (14.07)        | 78.26 (15.77)                                    | 71.95 (14.18)        | 65.08 (11.38)        |  |
| BMI (kg/m <sup>2</sup> )*             | 25.90 (4.54)         | 27.17 (4.98)                                     | 26.24 (4.76)         | 24.99 (3.83)         |  |
| Kcal days                             | 2066.12 (794.82)     | 3054.06 (947.87)                                 | 2164.47 (699.66)     | 1624.63 (552.07)     |  |
| Triglycerides (mmol/L)*               | 1.27 (0.91)          | 1.37 (1.13)                                      | 1.31 (0.90)          | 1.18 (0.84)          |  |
| Total Cholesterol (mmol/L)*           | 5.03 (1.03)          | 4.98 (1.07)                                      | 4.98 (0.98)          | 5.11 (1.09)          |  |
| HDL (mmol/L)*                         | 1.35 (0.34)          | 1.24 (0.29)                                      | 1.33 (0.34)          | 1.42 (0.34)          |  |
| LDL (mmol/L)*                         | 3.11 (0.89)          | 3.10 (0.88)                                      | 3.08 (0.86)          | 3.17 (0.94)          |  |
| Glucose (mmol/L)*                     | 5.62 (1.19)          | 5.66 (0.97)                                      | 5.60 (1.04)          | 5.65 (1.46)          |  |
| GPT (μkat/L)*                         | 0.26 (0.17)          | 0.32 (0.18)                                      | 0.27 (0.19)          | 0.23 (0.11)          |  |
| GGT(μkat/L)*                          | 0.22 (0.18)          | 0.27 (0.18)                                      | 0.23 (0.20)          | 0.19 (0.14)          |  |
| Sex***                                |                      |                                                  |                      |                      |  |
| Female                                | 1126 (55.8)          | 45 (23.1)                                        | 557 (49.1)           | 524 (76.1)           |  |
| Male                                  | 892 (44.2)           | 150 (76.9)                                       | 577 (50.9)           | 165 (23.9)           |  |
| Age (categorical, years)              |                      |                                                  |                      |                      |  |
| <40                                   | 735 (36.4)           | 89 (45.6)                                        | 451 (39.8)           | 195 (28.3)           |  |
| 40-49                                 | 403 (20.0)           | 51 (26.2)                                        | 214 (18.9)           | 138 (20.0)           |  |
| 50-59                                 | 456 (22.6)           | 35 (17.9)                                        | 256 (22.6)           | 165 (23.9)           |  |
| 60-69                                 | 259 (12.8)           | 10 (5.1)                                         | 130 (11.5)           | 119 (17.3)           |  |
| ≥70                                   | 165 (8.2)            | 10 (5.1)                                         | 83 (7.3)             | 72 (10.4)            |  |
| Smoke***                              |                      |                                                  |                      |                      |  |
| Never/Former                          | 1710 (84.7)          | 151 (77.4)                                       | 950 (83.8)           | 609 (88.4)           |  |
| Current                               | 308 (15.3)           | 44 (22.6)                                        | 184 (16.2)           | 80 (11.6)            |  |
| Observation time**                    | 14.74 (14.21. 14.87) | 14.74 (14.20. 14.86)                             | 14.74 (14.21. 14.88) | 14.75 (14.21. 14.87) |  |
| Age at Death (years)*                 | 61.12 (48.68. 72.74) | 55.63 (43.82. 64.98)                             | 59.48 (47.47. 72.17) | 65.29 (52.54. 75.61) |  |
| Status***                             |                      |                                                  |                      |                      |  |
| Alive and/or Censored                 | 1860 (92.2)          | 185 (94.9)                                       | 1044 (92.1)          | 631 (91.6)           |  |
| Dead                                  | 158 (7.8)            | 10 (5.1)                                         | 90 (7.9)             | 58 (8.4)             |  |
| Cause of Death***                     |                      |                                                  |                      |                      |  |
| Alive and/or Censored                 | 1860 (92.2)          | 185 (94.9)                                       | 1044 (92.1)          | 631 (91.6)           |  |
| DSD-related mortality                 | 27 (1.3)             | 0 (0.0)                                          | 19 (1.7)             | 8 (1.2)              |  |
| CVD-related mortality                 | 49 (2.4)             | 3 (1.5)                                          | 25 (2.2)             | 21 (3.0)             |  |
| CR-related mortality                  | 31 (1.5)             | 3 (1.5)                                          | 18 (1.6)             | 10 (1.5)             |  |
| Other-Cause mortality                 | 51 (2.5)             | 4 (2.1)                                          | 28 (2.5)             | 19 (2.8)             |  |
| Education***                          |                      |                                                  |                      |                      |  |
| Primary School                        | 485 (24.0)           | 27 (13.8)                                        | 272 (24.0)           | 186 (27.0)           |  |
| Secondary School                      | 599 (29.7)           | 76 (39.0)                                        | 337 (29.7)           | 186 (27.0)           |  |
| High School                           | 700 (34.7)           | 74 (37.9)                                        | 388 (34.2)           | 238 (34.5)           |  |
| Graduated                             | 169 (8.4)            | 14 (7.2)                                         | 104 (9.2)            | 51 (7.4)             |  |
| Illiterate                            | 65 (3.2)             | 4 (2.1)                                          | 33 (2.9)             | 28 (4.1)             |  |
| Job***                                |                      |                                                  |                      |                      |  |
| Managers & Professionals              | 162 (8.0)            | 28 (14.4)                                        | 101 (8.9)            | 33 (4.8)             |  |
| Craft. Agricultural and Sales Workers | 563 (27.9)           | 58 (29.7)                                        | 305 (26.9)           | 200 (29.0)           |  |
| Elementary Occupations                | 337 (16.7)           | 52 (26.7)                                        | 207 (18.3)           | 78 (11.3)            |  |
| Housewife                             | 312 (15.5)           | 15 (7.7)                                         | 142 (12.5)           | 155 (22.5)           |  |
| Pensioners                            | 434 (21.5)           | 20 (10.3)                                        | 244 (21.5)           | 170 (24.7)           |  |
| Jobless                               | 208 (10.3)           | 22 (11.3)                                        | 134 (11.8)           | 52 (7.5)             |  |

|                     |             |            |             |            |
|---------------------|-------------|------------|-------------|------------|
| Without Information | 2 (0.1)     | 0 (0.0)    | 1 (0.1)     | 1 (0.1)    |
| Marital Status***   |             |            |             |            |
| Single              | 455 (22.5)  | 56 (28.7)  | 279 (24.6)  | 120 (17.4) |
| Married/Coupled     | 1465 (72.6) | 132 (67.7) | 807 (71.2)  | 526 (76.3) |
| Separated/Divorced  | 33 (1.6)    | 2 (1.0)    | 16 (1.4)    | 15 (2.2)   |
| Widower             | 65 (3.2)    | 5 (2.6)    | 32 (2.8)    | 28 (4.1)   |
| Diabetes***         |             |            |             |            |
| No                  | 1973 (97.8) | 189 (96.9) | 1113 (98.1) | 671 (97.4) |
| Yes                 | 45 (2.2)    | 6 (3.1)    | 21 (1.9)    | 18 (2.6)   |
| Dyslipidemia ***    |             |            |             |            |
| No                  | 1939 (96.1) | 189 (96.9) | 1095 (96.6) | 655 (95.1) |
| Yes                 | 79 (3.9)    | 6 (3.1)    | 39 (3.4)    | 34 (4.9)   |
| Hypertension***     |             |            |             |            |
| No                  | 1767 (87.6) | 175 (89.7) | 1004 (88.5) | 588 (85.3) |
| Yes                 | 251 (12.4)  | 20 (10.3)  | 130 (11.5)  | 101 (14.7) |

GGT:  $\gamma$ -Glutamyltransferase ; GPT: Glutamate Pyruvate; BMI: Body Mass Index; DBP: Diastolic Blood Pressure; SBP: Systolic Blood Pressure; HDL: High Density Lipoprotein Cholesterol; LDL: Low Density Lipoprotein Cholesterol; RChol: Remnant Cholesterol; CVD-related mortality: Cardiovascular Disease related mortality; DSD-related mortality: Digestive System Disease -related mortality. Cells reporting subject characteristics contain \* Mean  $\pm$ (SD). \*\*Median (IQR). \*\*\*Number. <sup>‡</sup>(Percentage) Percentages calculated per column.

Supplementary Table S4. Sensitivity analysis to obtain age at death range. All causes mortality MICOL/PANEL and NUTRIHEP studies. Castellana Grotte, Putignano (BA), Italy, 2005 - 2020.

| Modified WCRF/AICR score >7 |        | All Causes mortality                      |       |           |                |
|-----------------------------|--------|-------------------------------------------|-------|-----------|----------------|
| Age at death (range)        |        | N failures tot (N.failures in category>7) | HR    | 95% CI    | AIC-BIC        |
| ≤90                         | Whole  | 622 (154)                                 | 0.75  | 0.57-1.00 | <b>89-225</b>  |
|                             | Female | 232 (92)                                  | 1.38  | 0.75-2.52 | <b>100-214</b> |
|                             | Male   | 390 (62)                                  | 0.56* | 0.39-0.82 | <b>10-125</b>  |
| ≤89                         | Whole  | 593 (140)                                 | 0.82  | 0.61-1.10 | 137-272        |
|                             | Female | 218 (85)                                  | 1.51  | 0.82-2.78 | 111-225        |
|                             | Male   | 375 (55)                                  | 0.63* | 0.43-0.92 | 18-164         |
| ≤88                         | Whole  | 563 (130)                                 | 0.88  | 0.65-1.19 | 167-302        |
|                             | Female | 207 (82)                                  | 1.57  | 0.81-3.03 | 106-220        |
|                             | Male   | 356 (48)                                  | 0.71  | 0.48-1.05 | 85-200         |
| ≤87                         | Whole  | 533 (124)                                 | 0.87  | 0.64-1.18 | 182-317        |
|                             | Female | 201 (78)                                  | 1.70  | 0.87-3.32 | 62-175         |
|                             | Male   | 332 (46)                                  | 0.67  | 0.45-1.01 | 131-246        |
| ≤86                         | Whole  | 503 (117)                                 | 0.90  | 0.65-1.24 | 198-332        |
|                             | Female | 191 (75)                                  | 1.59  | 0.74-3.40 | 57-170         |
|                             | Male   | 312 (42)                                  | 0.74  | 0.49-1.11 | 147-262        |
| ≤85                         | Whole  | 469 (107)                                 | 0.93  | 0.67-1.29 | 223-357        |
|                             | Female | 179 (69)                                  | 1.70  | 0.75-3.84 | 61-173         |
|                             | Male   | 290 (38)                                  | 0.75  | 0.49-1.15 | 171-285        |

Adjusted for: Hypertension , Glutamate Pyruvate Transaminase (μkat/L), γ-Glutamyltransferase μkat/L), Glucose (mmol/L), Triglycerides in range vs non in range Marital Status; Education, Smoke (Never/Former vs Current) and BMI: Body Mass Index (kg/m<sup>2</sup>)

\*p< 0.05; HR: Hazard Ratio; AIC and BIC: Akaike's and Schwarz's Bayesian information criteria

Supplementary Table S5. Sensitivity analysis to obtain age at death range by cause-specific mortality. MICOL/PANEL and NUTRIHEP studies. Castellana Grotte, Putignano (BA), Italy, 2005 - 2020

| Modified WCRF/AICR score >7     |        |                                                 |       |            |                  |
|---------------------------------|--------|-------------------------------------------------|-------|------------|------------------|
| Age at death<br>(range)         |        | N failures tot<br>(N.failures in<br>category>7) | SHR   | 95% CI     | AIC-BIC          |
| <b>DSD-Related Mortality</b>    |        |                                                 |       |            |                  |
| ≤90                             | Whole  | 119 (30)                                        | 0.72  | 0.38-1.37  | <b>1603-1713</b> |
|                                 | Female | 41 (21)                                         | 2.62  | 0.62-11.00 | <b>484-575</b>   |
|                                 | Male   | 78 (9)                                          | 0.38* | 0.15-0.97  | <b>962-1054</b>  |
| ≤89                             | Whole  | 115 (27)                                        | 0.68  | 0.35-1.33  | 1550-1659        |
|                                 | Female | 41 (21)                                         | 2.64  | 0.65-10.63 | 477-568          |
|                                 | Male   | 74 (6)                                          | 0.28* | 0.09-0.92  | 916-1009         |
| ≤88                             | Whole  | 114 (27)                                        | 0.81  | 0.43-1.52  | 1501-1610        |
|                                 | Female | 40 (21)                                         | 2.49  | 0.62-10.05 | 462-553          |
|                                 | Male   | 74 (6)                                          | 0.41  | 0.15-1.07  | 895-987          |
| ≤87                             | Whole  | 104 (26)                                        | 0.96  | 0.51-1.81  | 1370-1479        |
|                                 | Female | 39 (20)                                         | 2.73  | 0.69-10.73 | 431-522          |
|                                 | Male   | 65 (6)                                          | 0.45  | 0.17-1.21  | 799-891          |
| ≤86                             | Whole  | 103 (26)                                        | 0.94  | 0.50-1.78  | 1331-1439        |
|                                 | Female | 39 (20)                                         | 2.56  | 0.65-10.00 | 423-514          |
|                                 | Male   | 64 (6)                                          | 0.47  | 0.18-1.24  | 770-862          |
| ≤85                             | Whole  | 94 (23)                                         | 1.14  | 0.57-2.28  | 1223-1332        |
|                                 | Female | 36 (18)                                         | 3.09  | 0.57-16.72 | 393-483          |
|                                 | Male   | 58 (5)                                          | 0.58  | 0.20-1.65  | 702-794          |
| <b>CVD-related mortality</b>    |        |                                                 |       |            |                  |
| ≤90                             | Whole  | 171 (46)                                        | 1.19  | 0.69-2.07  | <b>2218-2327</b> |
|                                 | Female | 60 (27)                                         | 4.14  | 0.61-28.29 | <b>671-762</b>   |
|                                 | Male   | 111 (19)                                        | 1.01  | 0.51-1.98  | <b>1328-1421</b> |
| ≤89                             | Whole  | 163 (43)                                        | 1.22  | 0.70-2.14  | 2093-2203        |
|                                 | Female | 56 (26)                                         | 4.60  | 0.69-30.72 | 616-707          |
|                                 | Male   | 107 (17)                                        | 0.98  | 0.49-1.97  | 1271-1363        |
| ≤88                             | Whole  | 150 (37)                                        | 1.14  | 0.63-2.04  | 1928-2037        |
|                                 | Female | 51 (24)                                         | 3.56  | 0.59-21.62 | 568-659          |
|                                 | Male   | 99 (13)                                         | 0.86  | 0.40-1.84  | 1177-1269        |
| ≤87                             | Whole  | 139 (36)                                        | 1.14  | 0.62-2.07  | 1779-1888        |
|                                 | Female | 49 (23)                                         | 3.83  | 0.69-21.21 | 538-629          |
|                                 | Male   | 90 (13)                                         | 0.90  | 0.41-1.95  | 1071-1163        |
| ≤86                             | Whole  | 127 (33)                                        | 1.14  | 0.61-2.13  | 1627-1736        |
|                                 | Female | 45 (21)                                         | NS    |            |                  |
|                                 | Male   | 82 (12)                                         | 0.93  | 0.43-2.04  | 978-1070         |
| ≤85                             | Whole  | 118 (30)                                        | 1.16  | 0.62-2.17  | 1483-1591        |
|                                 | Female | 41 (19)                                         | NS    |            |                  |
|                                 | Male   | 77 (11)                                         | 0.84  | 0.38-1.86  | 900-991          |
| <b>Cancer related mortality</b> |        |                                                 |       |            |                  |
| ≤90                             |        |                                                 |       |            |                  |



|                              |        |          |       |            |                  |
|------------------------------|--------|----------|-------|------------|------------------|
| ≤89                          | Whole  | 124 (29) | 0.63  | 0.35-1.12  | <b>1766-1876</b> |
|                              | Female | 52 (18)  | 1.90  | 0.42-8.60  | <b>671-762</b>   |
|                              | Male   | 72 (11)  | 0.43* | 0.19-0.97  | <b>932-1024</b>  |
| ≤88                          | Whole  | 119 (28) | 0.69  | 0.38-1.25  | 1707-1916        |
|                              | Female | 50 (17)  | 1.95  | 0.43-8.88  | 650-741          |
|                              | Male   | 69 (11)  | 0.50  | 0.22-1.12  | 900-992          |
| ≤87                          | Whole  | 118 (27) | 0.68  | 0.37-1.25  | 1679-1789        |
|                              | Female | 50 (17)  | 1.83  | 0.40-8.43  | 640-731          |
|                              | Male   | 68 (10)  | 0.48  | 0.21-1.11  | 882-974          |
| ≤86                          | Whole  | 116 (26) | 0.67  | 0.36-1.22  | 1639-1748        |
|                              | Female | 49 (16)  | 1.83  | 0.40-8.41  | 625-716          |
|                              | Male   | 67 (10)  | 0.49  | 0.21-1.12  | 858-950          |
| ≤85                          | Whole  | 112 (25) | 0.72  | 0.38-1.37  | 1585-1693        |
|                              | Female | 47 (16)  | 3.08  | 0.35-27.09 | 600-691          |
|                              | Male   | 65 (9)   | 0.49  | 0.20-1.16  | 834-925          |
| ≤90                          | Whole  | 111 (25) | 0.74  | 0.39-1.40  | 1544-1653        |
|                              | Female | 47 (16)  | 3.23  | 0.35-30.10 | 587-678          |
|                              | Male   | 64 (9)   | 0.50  | 0.21-1.18  | 808-899          |
| <b>Other-Cause mortality</b> |        |          |       |            |                  |
| ≤89                          | Whole  | 208 (49) | 0.87  | 0.53-1.45  | <b>2676-2785</b> |
|                              | Female | 79 (26)  | 0.43* | 0.21-0.89  | <b>863-954</b>   |
|                              | Male   | 129 (23) | 1.12  | 0.58-2.15  | <b>1536-1629</b> |
| ≤88                          | Whole  | 196 (42) | 0.83  | 0.50-1.39  | 2514-2623        |
|                              | Female | 71 (21)  | 0.40* | 0.20-0.83  | 779-870          |
|                              | Male   | 125 (21) | 1.12  | 0.58-2.17  | 1480-1573        |
| ≤87                          | Whole  | 181 (39) | 0.95  | 0.55-1.65  | 2339-2448        |
|                              | Female | 66 (20)  | 0.50  | 0.22-1.16  | 731-822          |
|                              | Male   | 115 (19) | 1.31  | 0.66-2.61  | 1373-1465        |
| ≤86                          | Whole  | 174 (36) | 0.84  | 0.48-1.46  | 2219-2328        |
|                              | Female | 64 (19)  | 0.49  | 0.21-1.16  | 698-789          |
|                              | Male   | 110 (17) | 1.08  | 0.53-2.20  | 1297-1389        |
| ≤85                          | Whole  | 161 (33) | 0.89  | 0.50-1.59  | 2052-2161        |
|                              | Female | 60 (18)  | 0.43* | 0.19-0.96  | 650-741          |
|                              | Male   | 101 (15) | 1.30  | 0.66-2.57  | 1191-1282        |
| ≤90                          | Whole  | 146 (29) | 0.83  | 0.45-1.53  | 1858-1967        |
|                              | Female | 55 (16)  | 0.49  | 0.20-1.22  | 588-678          |
|                              | Male   | 91 (13)  | 1.22  | 0.59-2.54  | 1079-1170        |

Adjusted for: Hypertension , Glutamate Pyruvate Transaminase (μkat/L), γ-Glutamyltransferase μkat/L), Glucose (mmol/L), Triglycerides in range vs non in range Marital Status; Education, Smoke (Never/Former vs Current) and BMI: Body Mass Index (kg/m<sup>2</sup>)

DSD-related mortality: Digestive System Disease –related mortality, CVD-related mortality Cardiovascular Disease related mortality. AIC and BIC: Akaike's and Schwarz's Bayesian information criteria. NS: Not estimable. \*p<0.05.

Supplementary Table S6. Mortality Rates (MR) and 95% Confidence Intervals (95% CI) for All Causes mortality, for DSD-related mortality, CVD-related, Cancer-related mortality and Other-Causes Mortality from modified WCRF/AICR MICOL/PANEL and NUTRIHEP studies. Castellana Grotte, Putignano (BA), Italy, 2005 - 2020

|                                 | Modified WCRF/AICR score |      |           |       |      |           |     |      |            | WCRF/AICR continuous |      |           |
|---------------------------------|--------------------------|------|-----------|-------|------|-----------|-----|------|------------|----------------------|------|-----------|
|                                 | ≤5                       |      |           | 5.5-7 |      |           | >7  |      |            |                      |      |           |
|                                 | ND                       | MR   | 95% CI    | ND    | MR   | 95% CI    | ND  | MR   | 95% CI     | ND                   | MR   | 95% CI    |
| <b>All causes mortality</b>     |                          |      |           |       |      |           |     |      |            |                      |      |           |
| Whole Sample                    | 88                       | 1.79 | 1.45;2.21 | 380   | 1.98 | 1.79;2.19 | 154 | 1.97 | 1.68;2.31  | 622                  | 1.95 | 1.80;2.11 |
| Female                          | 13                       | 1.37 | 0.79;2.36 | 127   | 1.44 | 1.21;1.72 | 92  | 1.64 | 1.34;2.02  | 232                  | 1.51 | 1.33;1.72 |
| Male                            | 75                       | 1.89 | 1.51;2.38 | 253   | 2.44 | 2.15;2.76 | 62  | 2.80 | 2.18;3.59  | 390                  | 2.36 | 2.13;2.60 |
| <b>DSD-related mortality</b>    |                          |      |           |       |      |           |     |      |            |                      |      |           |
| Whole Sample                    | 19                       | 0.39 | 0.25;0.61 | 70    | 0.37 | 0.29;0.46 | 30  | 0.38 | 0.27;0.55  | 119                  | 0.37 | 0.31;0.14 |
| Female                          | 2                        | 0.21 | 0.05;0.84 | 18    | 0.20 | 0.13;0.32 | 21  | 0.37 | 0.24;0.57  | 41                   | 0.27 | 0.20;0.36 |
| Male                            | 17                       | 0.43 | 0.27;0.70 | 52    | 0.50 | 0.38;0.66 | 9   | 0.41 | 0.21;0.78  | 78                   | 0.47 | 0.38      |
| <b>CVD-related mortality</b>    |                          |      |           |       |      |           |     |      |            |                      |      |           |
| Whole Sample                    | 22                       | 0.45 | 0.30;0.69 | 103   | 0.54 | 0.44;0.65 | 46  | 0.59 | 0.44;0.79  | 171                  | 0.54 | 0.46;0.62 |
| Female                          | 1                        | 0.10 | 0.01;0.75 | 32    | 0.36 | 0.26;0.51 | 27  | 0.48 | 0.33;0.70  | 60                   | 0.39 | 0.30;0.50 |
| Male                            | 21                       | 0.54 | 0.35;0.82 | 71    | 0.69 | 0.55;0.87 | 19  | 0.85 | 0.55;1.34  | 111                  | 0.68 | 0.56;0.81 |
| <b>Cancer-related mortality</b> |                          |      |           |       |      |           |     |      |            |                      |      |           |
| Whole Sample                    | 21                       | 0.43 | 0.28;0.66 | 74    | 0.38 | 0.30;0.48 | 29  | 0.37 | 0.26;0.53  | 124                  | 0.39 | 0.32;0.46 |
| Female                          | 2                        | 0.21 | 0.05;0.84 | 32    | 0.35 | 0.25;0.50 | 18  | 0.32 | 0.20;0.51  | 52                   | 0.33 | 0.25;0.44 |
| Male                            | 19                       | 0.49 | 0.31;0.76 | 42    | 0.41 | 0.30;0.55 | 11  | 0.50 | 0.27;0.90  | 72                   | 0.44 | 0.35;0.55 |
| <b>Other-Cause mortality</b>    |                          |      |           |       |      |           |     |      |            |                      |      |           |
| Whole Sample                    | 26                       | 0.51 | 0.35;0.76 | 133   | 0.69 | 0.58;0.82 | 49  | 0.63 | 0.47;0.83  | 208                  | 0.65 | 0.56;0.74 |
| Female                          | 8                        | 0.84 | 0.42;1.68 | 45    | 0.52 | 0.39;0.70 | 26  | 0.46 | 0.32;0.68  | 79                   | 0.52 | 0.42;0.65 |
| Male                            | 18                       | 0.43 | 0.27;0.70 | 88    | 0.83 | 0.68;1.03 | 23  | 1.04 | 0.69;1.556 | 129                  | 0.77 | 0.64;0.91 |

DSD-related mortality: Digestive System Disease Deaths; CVD-related mortality Cardiovascular Disease Deaths, **Cancer-related mortality**: Cancer Deaths; Other-Cause mortality: Other Causes Deaths. MR: Mortality Rates for 1000 person-years ND: Number Deaths
