# Supplementary figures and images for: Modified WCRF/AICR Score and All-Cause, Digestive System, Cardiovascular, Cancer and Other-Cause-Related Mortality: A Competing Risk Analysis of Two Cohort Studies Conducted in Southern Italy
Source: MDPI journal article supplement (doi:10.3390/nu13114002), 2021-11-10

Supplementary figure S2. MICOL/PANEL study Participant Flow Chart

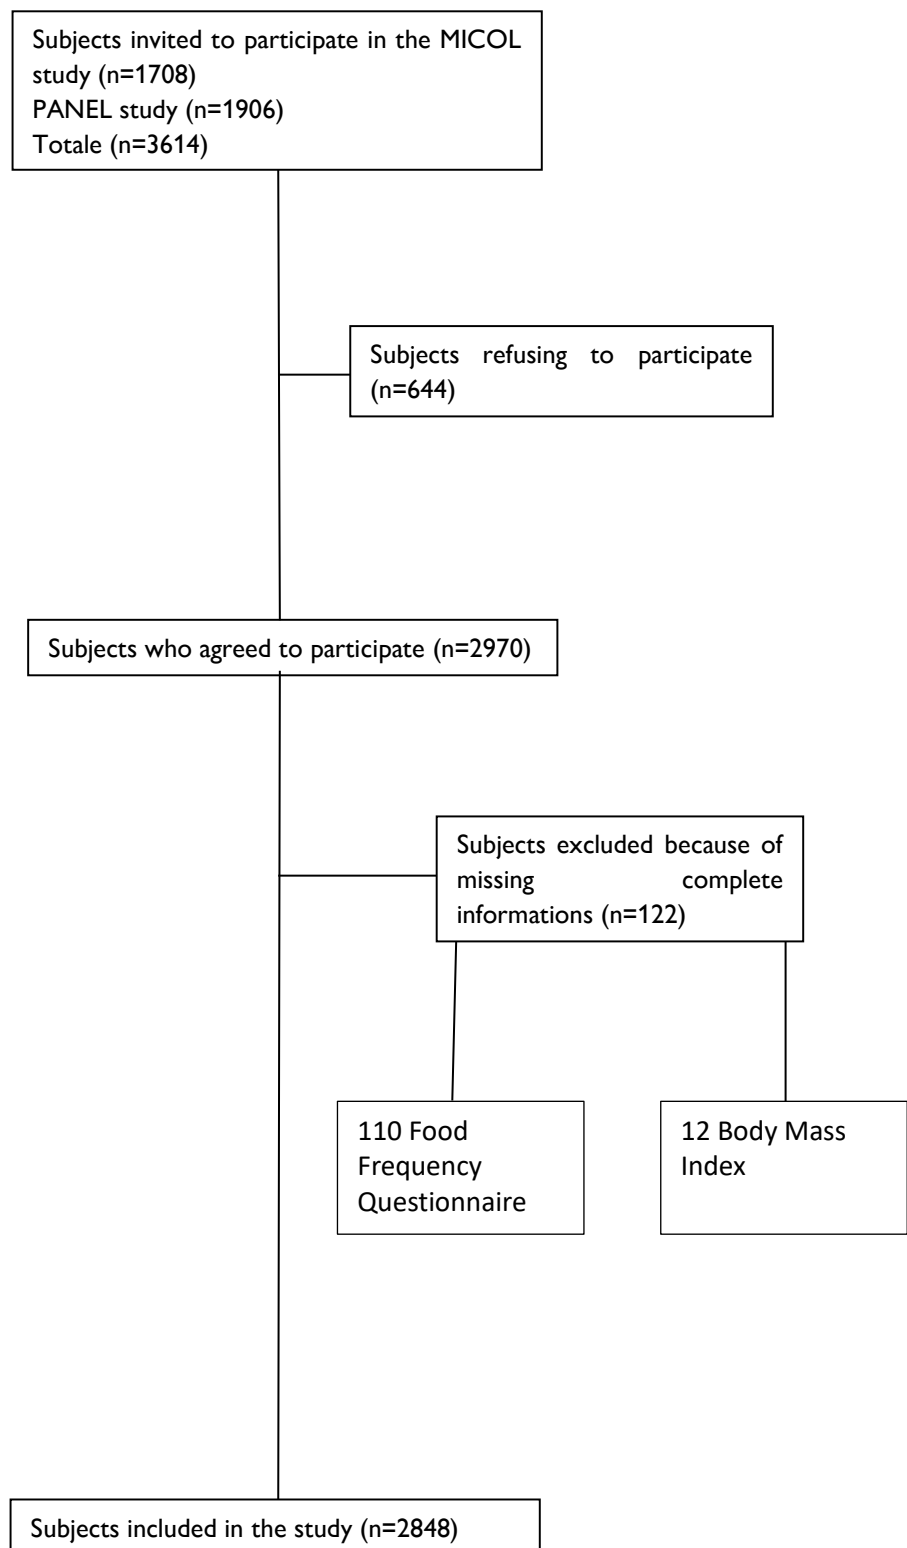

Supplement: s1 [file s1]

Supplementary figure S1. NUTRIHEP study Participant: Flow Chart

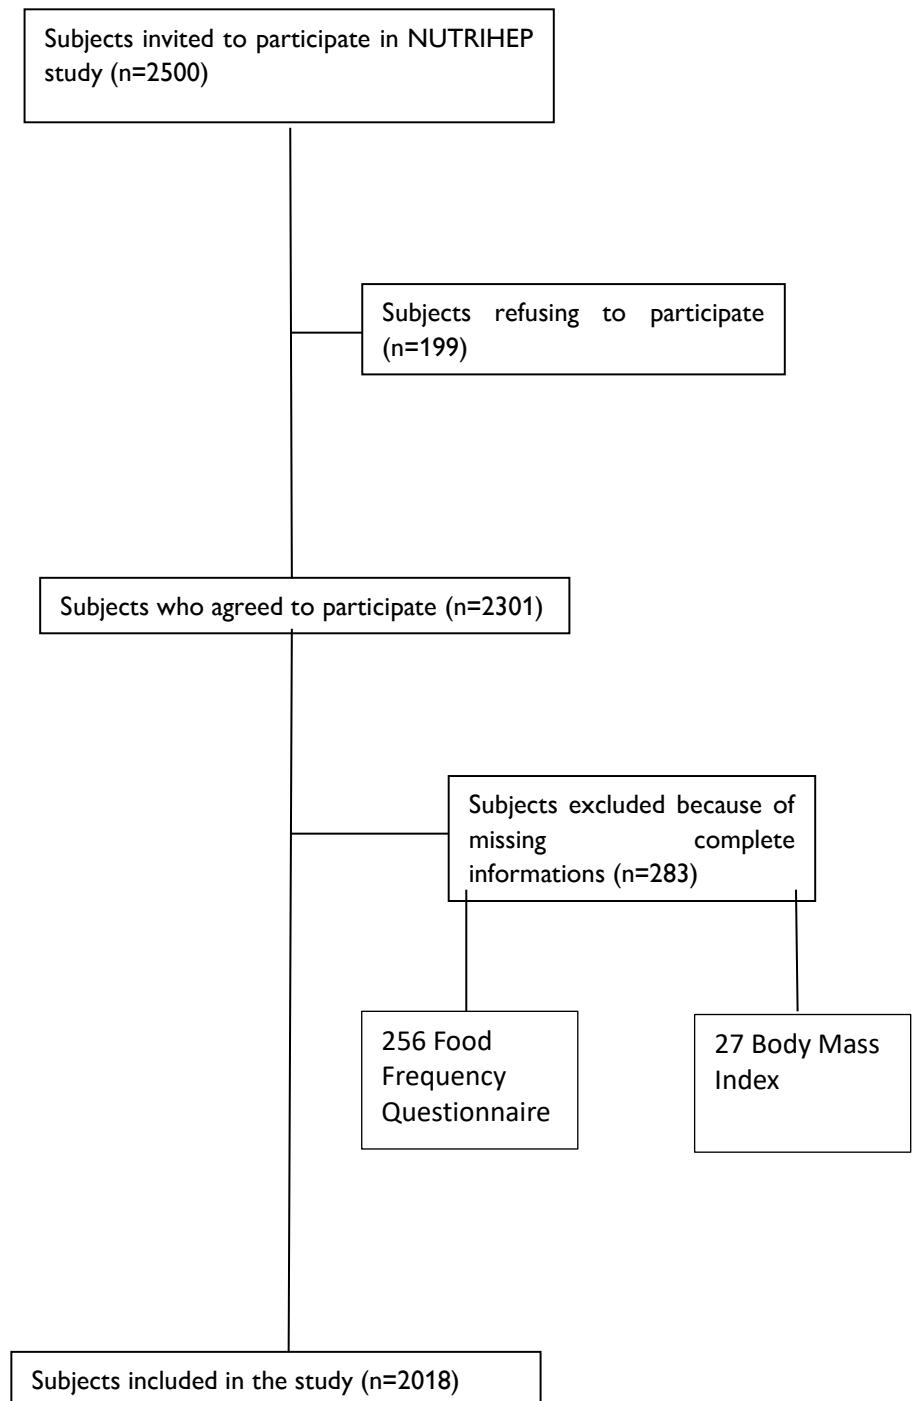

Supplement: s1 [file s1]
